# Supplementary material for: Identification and Introgression of Bacterial Blight Resistance From African Rice (Oryza Glaberrima Steud.)
Source: Research Square preprint supplement (doi:10.21203/rs.3.rs-1246576/v1), 2022-01-17
Supplement: Supplementary file 1 [file 7b6c369f2fc1c48c24c2d8f7.doc]

**Supplementary Table 1. Disease reaction of *Oryza glaberrima* *Oryza glaberrima* accessions against *X00* strain IX-020**

| **S. No.** | **EC number** | **IRGC number** | **Score** | **Lesion length (cm)** | | | |
| --- | --- | --- | --- | --- | --- | --- | --- |
| ***Kharif* 2016** | ***Kharif***  **2017** | ***Kharif* 2018** | ***Kharif* 2019** | **Mean lesion length (cm)** |
|  | IR64 | IR64 | 9 | 7.4 | 8.2 | 7.3 | 7.6 |
|  | EC861784 | IRGC105015 | 1 | 0.7 | 0.8 | 0.3 | 0.6 |
|  | EC861785 | IRGC105016 | 1 | 0.2 | 0.9 | 0.5 | 0.5 |
|  | EC861786 | IRGC105017 | 1 | 0.3 | NI | 0.5 | 0.4 |
|  | EC861787 | IRGC105018 | 1 | 0.3 | 1.5 | 0.7 | 0.8 |
|  | EC861790 | IRGC105021 | 1 | 0.3 | 1 | 0.6 | 0.6 |
|  | EC861791 | IRGC105022 | 1 | 0.5 | 0.4 | 0.2 | 0.4 |
|  | EC861792 | IRGC105023 | 1 | 0.4 | 0.7 | 1 | 0.7 |
|  | EC861794 | IRGC105026 | 1 | 0.2 | 0.6 | NI | 0.4 |
|  | EC861795 | IRGC105027 | 1 | 0.1 | 0.4 | 0.5 | 0.3 |
|  | EC861796 | IRGC105028 | 1 | 0.2 | 0.3 | 1.1 | 0.5 |
|  | EC861797 | IRGC105029 | 1 | 0.2 | 0.5 | 0.4 | 0.4 |
|  | EC861799 | IRGC105032 | 1 | 0.2 | 0.4 | 1 | 0.5 |
|  | EC861801 | IRGC105034 | 1 | 0.3 | 0.6 | 0.7 | 0.5 |
|  | EC861802 | IRGC105035 | 1 | 0.3 | 0.6 | 0.6 | 0.5 |
|  | EC861803 | IRGC105036 | NI | 2.9 | 0.5 | 0.2 | 1.2 |
|  | EC861804 | IRGC105037 | 9 | 34.4 | 27.2 | NI | 30.8 |
|  | EC861805 | IRGC105038 | 1 | 0.5 | 1 | 0.6 | 0.7 |
|  | EC861807 | IRGC105040 | 1 | 0.3 | 1.2 | 2.2 | 1.2 |
|  | EC861808 | IRGC105041 | 1 | 0.2 | 1.1 | 0.3 | 0.5 |
|  | EC861809 | IRGC105042 | 1 | NI | 0.7 | 0.7 | 0.7 |
|  | EC861810 | IRGC105043 | 1 | 0.2 | 0.3 | 0.5 | 0.3 |
|  | EC861811 | IRGC105044 | NI | 0.2 | 4.7 | 0.4 | 1.8 |
|  | EC861812 | IRGC105045 | 1 | 1.0 | 0.4 | 0.4 | 0.6 |
|  | EC861813 | IRGC105046 | 5 | 0.6 | 0.5 | 1 | 0.7 |
|  | EC861814 | IRGC105048 | 1 | 0.4 | 0.7 | 1.7 | 0.9 |
|  | EC861815 | IRGC105049 | 1 | 0.9 | NI | 0.7 | 0.8 |
|  | EC861816 | IRGC105050 | 1 | 0.3 | 2.3 | NI | 1.3 |
|  | EC861817 | IRGC105051 | 3 | 0.5 | 0.5 | 0.4 | 0.5 |
|  | EC861818 | IRGC105052 | 1 | 0.3 | 3.2 | 0.3 | 1.3 |
|  | EC861819 | IRGC105187 | 9 | 4.8 | 2.4 | 4.7 | 4.0 |
|  | EC861820 | IRGC105189 | 5 | 4.6 | 3.4 | 3.7 | 3.9 |

***** **Disease reaction was based on Chen *et al.* (2000) Resistant (R): ≤3cm; Moderately resistant (MR): 3-6cm; Moderately susceptible (MS): 6-9cm; Susceptible (S): >9cm; NI: not inoculated**

**Supplementary Table 2.** **Molecular profiling of BB resistant accessions of *O. glaberrima* using BB resistance genes specific markers**

| S. No. | **Genotypes** | **BB resistance genes and marker name** | | | |
| --- | --- | --- | --- | --- | --- |
| ***xa*5** | ***xa*13** | ***Xa*21** | ***Xa*38** |
| **xa5FM** | **xa13prom** | **pTA248** | **Oso4g53050-1** |
| 1 | Improved Samba Mahsuri (*xa5*, *xa13* and *Xa21*) | 134 | 450 | 950 | - |
| 2 | PR114 (*Xa38*) | - | - | - | 269 |
| 3 | IR64 (Negative check) | 313 | 220 | 650 | 317 |
| 4 | EC861784 | 313 | 220 | 650 | 317 |
| 5 | EC861785 | 313 | 220 | 650 | 317 |
| 6 | EC861786 | 313 | 220 | 650 | 317 |
| 7 | EC861787 | 313 | 220 | 650 | 317 |
| 8 | EC861790 | 313 | 220 | 650 | 317 |
| 9 | EC861791 | 313 | 220 | 650 | 317 |
| 10 | EC861792 | 313 | 220 | 650 | 317 |
| 11 | EC861794 | 313 | 220 | 650 | 317 |
| 12 | EC861795 | 313 | 220 | 650 | 317 |
| 13 | EC861796 | 313 | 220 | 650 | 317 |
| 14 | EC861797 | 313 | 220 | 650 | 317 |
| 15 | EC861799 | 313 | 220 | 650 | 317 |
| 16 | EC861801 | 313 | 220 | 650 | 317 |
| 17 | EC861802 | 313 | 220 | 650 | 317 |
| 18 | EC861803 | 313 | 220 | 650 | 317 |
| 19 | EC861804 | 313 | 220 | 650 | 317 |
| 20 | EC861805 | 313 | 220 | 650 | 317 |
| 21 | EC861807 | 313 | 220 | 650 | 317 |
| 22 | EC861808 | 313 | 220 | 650 | 317 |
| 23 | EC861809 | 313 | 220 | 650 | 317 |
| 24 | EC861810 | 313 | 220 | 650 | 317 |
| 25 | EC861811 | 313 | 220 | 650 | 317 |
| 26 | EC861812 | 313 | 220 | 650 | 317 |
| 27 | EC861813 | 313 | 220 | 650 | 317 |
| 28 | EC861814 | 313 | 220 | 650 | 317 |
| 29 | EC861815 | 313 | 220 | 650 | 317 |
| 30 | EC861816 | 313 | 220 | 650 | 317 |
| 31 | EC861817 | 313 | 220 | 650 | 317 |
| 32 | EC861818 | 313 | 220 | 650 | 317 |
| 33 | EC861819 | 313 | 220 | 650 | 317 |
| 34 | EC861820 | 313 | 220 | 650 | 317 |

**Supplementary Table 3.** **Screening of BC1F2 population against of *X00* strain IX-020**

| **S. No.** | **Plants** | **leaf1** | **leaf2** | **leaf3** | **leaf4** | **leaf5** | **Mean lesion**  **length(cm)** |
| --- | --- | --- | --- | --- | --- | --- | --- |
| Recurrent parent | EC861812 | 2 | 0.9 | 1 | 1.5 | 1.4 | 1.36 |
| Donor parent | IR 64 | 5.5 | 12.5 | 7.5 | 8.2 | 7.5 | 8.24 |
| 1 | 58*-1-1 | 10 | 12.2 | 8 | 11 | 10.5 | 10.34 |
| 2 | 58*-1-2 | 2.5 | 3 | 3 | 4.5 | 3.5 | 3.3 |
| 3 | 58*-1-3 | 5.5 | 10.5 | 10 | 6 | 5.5 | 7.5 |
| 4 | 58*-1-4 | 3 | 2.5 | 3.5 | 2.5 | 2 | 2.7 |
| 5 | 58*-1-5 | 4.5 | 8 | 8.5 | 9 | 7 | 7.4 |
| 6 | 58*-1-6 | 7 | 8 | 6.5 | 6 | 6.5 | 6.8 |
| 7 | 58*-1-7 | 3.5 | 8 | 6.5 | 9 | 4.5 | 6.3 |
| 8 | 58*-1-8 | 9 | 8 | 9.5 | 8.5 | 8 | 8.6 |
| 9 | 58*-1-9 | 3.5 | 2 | 3.5 | 3 | 4.5 | 3.3 |
| 10 | 58*-1-10 | 7 | 5.5 | 8.5 | 7.5 | 8 | 7.3 |
| 11 | 58*-1-11 | 3 | 2.5 | 3.5 | 3.5 | 6 | 3.7 |
| 12 | 58*-1-12 | 7 | 7 | 8 | 8.5 | 9.5 | 8 |
| 13 | 58*-1-13 | 13 | 14 | 10.5 | 11.2 | 12.5 | 12.24 |
| 14 | 58*-1-14 | 2 | 1.5 | 0.5 | 2.5 | 2 | 1.7 |
| 15 | 58*-1-15 | 1.5 | 1.5 | 4 | 2.5 | 3.5 | 2.6 |
| 16 | 58*-1-16 | 7.5 | 5.5 | 3.5 | 4 | 5.5 | 5.2 |
| 17 | 58*-1-17 | 4 | 5 | 2 | 3 | 4 | 3.6 |
| 18 | 58*-1-18 | 5 | 8 | 5 | 5.5 | 6.2 | 5.94 |
| 19 | 58*-1-19 | 6 | 6.5 | 8 | 10 | 7.5 | 7.6 |
| 20 | 58*-1-20 | 10 | 8 | 14 | 10 | 10.5 | 10.5 |
| 21 | 58*-1-21 | 4 | 1 | 6 | 7.5 | 5 | 4.7 |
| 22 | 58*-1-22 | 4.5 | 4 | 4.5 | 4.5 | 4 | 4.3 |
| 23 | 58*-1-23 | 2.5 | 2.5 | 2.5 | 3 | 2.5 | 2.6 |
| 24 | 58*-1-24 | 4 | 3.5 | 3.5 | 3 | 3.5 | 3.5 |
| 25 | 58*-1-25 | 2 | 1.5 | 1.5 | 3 | 2.5 | 2.1 |
| 26 | 58*-2-1 | 5.5 | 4 | 4.5 | 4.5 | 4 | 4.5 |
| 27 | 58*-2-2 | 3 | 2.5 | 2 | 1.5 | 2 | 2.2 |
| 28 | 58*-2-3 |  |  |  |  |  | NI |
| 29 | 58*-2-4 | 2.5 | 2 | 1.5 | 2.5 | 2 | 2.1 |
| 30 | 58*-2-5 | 3.5 | 2.5 | 3.5 | 3 | 3.2 | 3.14 |
| 31 | 58*-2-6 | 1 | 0 | 1 | 1.2 | 1 | 0.84 |
| 32 | 58*-2-7 | 5 | 4 | 4.5 | 4.5 | 4 | 4.4 |
| 33 | 58*-2-8 | 6 | 6.5 | 5.5 | 6 | 6.5 | 6.1 |
| 34 | 58*-2-9 | 6 | 35 | 2 | 2.5 | 3 | 9.7 |
| 35 | 58*-2-10 | 3 | 3.5 | 3.5 | 3 | 4 | 3.4 |
| 36 | 58*-2-11 | 1 | 1.5 | 0 | 1 | 1.5 | 1 |
| 37 | 58*-2-12 | 5 | 4 | 5.5 | 3.5 | 3.5 | 4.3 |
| 38 | 58*-2-13 | 5 | 9 | 5.5 | 8 | 8.5 | 7.2 |
| 39 | 58*-2-14 | 0.5 | 0.7 | 0.8 | 0.9 | 1.2 | 0.82 |
| 40 | 58*-2-15 | 6 | 4.5 | 5 | 3.5 | 4 | 4.6 |
| 41 | 58*-2-16 | 5 | 3 | 3.5 | 7 | 6 | 4.9 |
| 42 | 58*-3-1 | 8.5 | 9.5 | 10 | 7 | 10 | 9 |
| 43 | 58*-3-2 | 4 | 5 | 4 | 5.5 | 5 | 4.7 |
| 44 | 58*-3-3 | 1.3 | 1.4 | 1.5 | 1 | 1.2 | 1.28 |
| 45 | 58*-3-4 |  |  |  |  |  | NI |
| 46 | 58*-3-5 | 7.5 | 4 | 9 | 6 | 4 | 4.5 |
| 47 | 58*-3-6 | 25 | 4 | 3 | 3.5 | 3.8 | 7.86 |
| 48 | 58*-3-7 | 9.5 | 8 | 9 | 8.5 | 9 | 8.8 |
| 49 | 58*-3-8 | 5.5 | 6 | 5 | 4.5 | 4.5 | 5.1 |
| 50 | 58*-3-9 | 13 | 10.5 | 14 | 8 | 10 | 11.1 |
| 51 | 58*-3-10 | 7.5 | 4 | 4 | 3.5 | 4 | 4.6 |
| 52 | 58*-3-11 | 7 | 6.5 | 8 | 5 | 6 | 6.5 |
| 53 | 58*-3-12 | 8 | 5.5 | 4.5 | 5.5 | 8 | 5.5 |
| 54 | 58*-3-13 | 4 | 2.5 | 4 | 3.5 | 3 | 3.4 |
| 55 | 58*-3-14 | 5 | 5 | 4.5 | 5 | 5 | 4.9 |
| 56 | 58*-3-15 | 10 | 12.5 | 8 | 7 | 13 | 10.1 |
| 57 | 58*-3-16 | 5.5 | 7 | 4 | 7 | 4.5 | 5.6 |
| 58 | 58*-3-17 | 11 | 7 | 5 | 5 | 5 | 6.6 |
| 59 | 58*-3-18 | 3 | 3 | 6 | 4.5 | 5 | 4.3 |
| 60 | 58*-3-19 | 5 | 10 | 8 | 7 | 10 | 6.5 |
| 61 | 58*-3-20 | 9 | 14 | 10 | 11.5 | 11 | 11.1 |
| 62 | 58*-3-21 | 8 | 6.5 | 5 | 6 | 6.5 | 6.4 |
| 63 | 58*-3-22 | 4 | 8 | 5.5 | 6 | 7.5 | 6.2 |
| 64 | 58*-3-23 | 2.5 | 2 | 2.5 | 2 | 2.5 | 2.3 |
| 65 | 58*-3-24 | 5 | 3 | 5.5 | 6 | 5.5 | 5 |
| 66 | 58*-3-25 | 6 | 5.5 | 4 | 6 | 5.5 | 5.4 |
| 67 | 58*-3-26 | 6 | 5 | 4.5 | 4 | 4.5 | 4.8 |
| 68 | 58*-3-27 | 7 | 7.5 | 7 | 6.5 | 7 | 7 |
| 69 | 58*-3-28 | 5.5 | 5.5 | 6 | 4 | 5 | 5.2 |
| 70 | 58*-3-29 | 5.5 | 6 | 5 | 5 | 4 | 5.1 |
| 71 | 58*-4-1 | 2 | 5 | 3 | 4 | 3 | 3.4 |
| 72 | 58*-4-2 | 5.5 | 4.5 | 6 | 6 | 5.5 | 5.5 |
| 73 | 58*-4-3 | 4.5 | 5 | 5.5 | 5.5 | 5 | 5.1 |
| 74 | 58*-4-4 | 6 | 6.5 | 7 | 6.5 | 7.5 | 6.7 |
| 75 | 58*-4-5 | 5 | 3.5 | 4 | 3 | 3.5 | 3.8 |
| 76 | 58*-4-6 | 4 | 3 | 2 | 2.5 | 2 | 2.7 |
| 77 | 58*-4-7 | 3.5 | 3 | 3.5 | 3 | 2 | 3 |
| 78 | 58*-4-8 | 2 | 1 | 0 | 1 | 1.2 | 1.04 |
| 79 | 58*-4-9 | 3.5 | 4 | 4.5 | 4 | 3.5 | 3.9 |
| 80 | 58*-4-10 | 3 | 3.5 | 3 | 3 | 3.5 | 3.2 |
| 81 | 58*-4-11 | 7.5 | 7 | 6.5 | 6 | 5.5 | 6.5 |
| 82 | 58*-4-12 | 4 | 8 | 8.5 | 7 | 6 | 6.7 |
| 83 | 58*-4-13 | 1.5 | 1.8 | 2 | 1 | 1.5 | 1.56 |
| 84 | 58*-4-14 | 2 | 1.8 | 1.5 | 1.5 | 1 | 1.56 |
| 85 | 58*-4-15 | 5.5 | 3 | 6.5 | 5.5 | 5 | 5.1 |
| 86 | 58*-5-1 | 10 | 13 | 12.5 | 11 | 11.5 | 11.6 |
| 87 | 58*-5-2 | 10.5 | 7.9 | 6.9 | 12.5 | 7 | 8.96 |
| 88 | 58*-5-3 | 7.9 | 8.2 | 9 | 9.3 | 4.2 | 7.72 |
| 89 | 58*-5-4 | 6.5 | 8.9 | 9.8 | 7.9 | 9 | 8.42 |
| 90 | 58*-5-5 | 9 | 4.5 | 6.9 | 2.5 | 5 | 5.58 |
| 91 | 58*-5-6 | 2.5 | 1.5 | 1.5 | 2 | 1.8 | 1.86 |
| 92 | 58*-5-7 | 3.6 | 3.1 | 2.8 | 1.5 | 3 | 2.8 |
| 93 | 58*-6-1 | 10 | 7.9 | 9.5 | 11.2 | 7.8 | 9.28 |
| 94 | 58*-6-2 | 3.5 | 2.8 | 4.5 | 4.5 | 3 | 3.66 |
| 95 | 58*-6-3 | 5 | 5.2 | 8 | 9.2 | 8.8 | 7.24 |
| 96 | 58*-6-4 | 2.9 | 4 | 3.2 | 2.5 | 1.8 | 2.88 |
| 97 | 58*-6-5 | 2 | 2.6 | 1.5 | 1.8 | 1.6 | 1.9 |
| 98 | 58*-6-6 | 3.5 | 3 | 4.2 | 4.8 | 4.2 | 3.94 |
| 99 | 58*-6-7 | 6.5 | 7.5 | 5.5 | 4.8 | 7.2 | 6.3 |
| 100 | 58*-6-8 | 3 | 2.5 | 2.3 | 2.1 | 2 | 2.38 |
| 101 | 58*-6-9 | 1.5 | 1.3 | 1.6 | 1.2 | 1.6 | 1.44 |
| 102 | 58*-6-10 | 1.8 | 1.9 | 1.5 | 2.2 | 2.5 | 1.98 |
| 103 | 58*-6-11 | 3 | 2.5 | 2.8 | 1.5 | 1.8 | 2.32 |
| 104 | 58*-6-12 | 1.2 | 1 | 1.8 | 1.2 | 1.5 | 1.34 |
| 105 | 58*-6-13 | 2 | 2.5 | 1.8 | 1 |  | 1.825 |
| 106 | 58*-6-14 | 1.9 | 1.8 | 0.7 | 1.2 | 3.5 | 1.82 |
| 107 | 58*-6-15 | 5.8 | 4.2 | 2.5 | 6.5 | 6.8 | 5.16 |
| 108 | 58*-7-1 | 2.5 | 1.8 | 2.6 | 2.5 | 2.7 | 2.42 |
| 109 | 58*-7-2 | 6.9 | 4.8 | 5 | 6 | 6.9 | 5.92 |
| 110 | 58*-7-3 | 3.5 | 6.5 | 9.5 | 5.5 | 5.8 | 6.16 |
| 111 | 58*-7-4 | 4.5 | 5.5 | 4.5 | 5 | 5.6 | 5.02 |
| 112 | 58*-7-5 | 5 | 7 | 4.8 | 3.5 | 7 | 5.46 |
| 113 | 58*-7-6 | 4.5 | 5.5 | 4.2 | 3.2 | 3.4 | 4.16 |
| 114 | 58*-7-7 | 10.2 | 10.5 | 10.6 | 7.9 | 7.8 | 9.4 |
| 115 | 58*-7-8 | 1.5 | 1.3 | 1.2 | 1.5 | 2 | 1.5 |
| 116 | 58*-7-9 | 6.8 | 7.9 | 8.2 | 6 | 7.2 | 7.22 |
| 117 | 58*-7-10 | 5.2 | 6.5 | 4 | 3.5 | 4.5 | 4.74 |
| 118 | 58*-7-11 | 6.5 | 3.8 | 4.9 | 4.6 | 4.1 | 4.78 |
| 119 | 58*-7-12 | 2.8 | 3 | 2 | 2.5 | 2.4 | 2.54 |
| 120 | 58*-7-13 | 2.1 | 1.8 | 1.4 | 2.5 | 1.6 | 1.88 |
| 121 | 58*-7-14 | 1.8 | 1.5 | 1.6 | 1.8 | 2.5 | 1.84 |
| 122 | 58*-7-15 | 2.5 | 3.2 | 7 | 4.9 | 4.6 | 4.44 |
| 123 | 58*-7-16 | 2.5 | 1.2 | 1.3 | 1.5 | 1.6 | 1.62 |
| 124 | 58*-7-17 | 13 | 9 | 6.8 | 5.9 | 4.8 | 7.9 |
| 125 | 58*-7-18 | 6.1 | 3.8 | 7.9 | 8 | 7.2 | 6.6 |
| 126 | 58*-7-19 | 9.5 | 7.5 | 5.8 | 9 | 7.8 | 7.92 |
| 127 | 58*-7-20 | 4.8 | 4.5 | 4.2 | 5.2 | 5.3 | 4.8 |
| 128 | 58*-7-21 | 15 | 1 | 1.5 | 1.3 | 1.2 | 4 |
| 129 | 58*-7-22 | 15 | 3.5 | 3.5 | 3.7 | 3 | 5.74 |
| 130 | 58*-7-23 | 6 | 9.5 | 4.8 | 3.9 | 3 | 5.44 |
| 131 | 58*-7-24 | 2.1 | 2.3 | 2 | 2.5 | 2 | 2.18 |
| 132 | 58*-7-25 | 0.8 | 1.3 | 1 | 0.9 | 1 | 1 |
| 133 | 58*-7-26 | 4.2 | 4.6 | 6.2 | 5.2 | 3.5 | 4.74 |
| 134 | 58*-7-27 | 2.8 | 2.4 | 1.5 | 1.1 | 1.3 | 1.82 |
| 135 | 58*-8-1 | 4.2 | 3.5 | 7.5 | 5 | 4.8 | 5 |
| 136 | 58*-8-2 | 4.2 | 1.8 | 1.7 | 1.5 | 1.3 | 2.1 |
| 137 | 58*-8-3 | 3.2 | 5 | 3.8 | 3.9 | 4 | 3.98 |
| 138 | 58*-8-4 | 0.5 | 1.2 | 0.8 | 7 | 1.8 | 2.26 |
| 139 | 58*-8-5 | 3.5 | 3 | 2.8 | 2.5 | 2 | 2.76 |
| 140 | 58*-8-6 | 4.5 | 2 | 3.4 | 4 | 5 | 3.78 |
| 141 | 58*-8-7 | 9 | 5.4 | 6.2 | 6.5 | 7.5 | 6.92 |
| 142 | 58*-8-8 | 2 | 1.5 | 1.6 | 1.7 | 1.9 | 1.74 |
| 143 | 58*-8-9 | 2.5 | 2 | 2.5 | 2.7 | 3 | 2.54 |
| 144 | 58*-8-10 | 11.5 | 9.5 | 7.2 | 5.1 | 6.2 | 7.9 |
| 145 | 58*-8-11 | 6.2 | 5 | 6.9 | 5.5 | 3.5 | 5.42 |
| 146 | 58*-8-12 | 2.5 | 1 | 1.5 | 1.8 | 2.1 | 1.78 |
| 147 | 58*-8-13 | 7.5 | 6.8 | 5.9 | 7.5 | 6.2 | 6.78 |
| 148 | 58*-8-14 | 1.8 | 6.2 | 4 | 1.5 | 1.8 | 3.06 |
| 149 | 58*-8-15 | 1.8 | 1.8 | 1.5 | 1.8 | 1.6 | 1.7 |
| 150 | 58*-9-1 | 5 | 4 | 4.5 | 4.3 | 4 | 4.36 |
| 151 | 58*-9-2 | 6.8 | 4.9 | 5.6 | 4.2 | 3.9 | 5.08 |
| 152 | 58*-9-3 | 1.4 | 1 | 8 | 2.2 | 1.8 | 2.88 |
| 153 | 58*-9-4 | 3 | 2.8 | 2.6 | 3.8 | 2.5 | 2.94 |
| 154 | 58*-9-5 | 1.5 | 2.2 | 2 | 2.6 | 3.2 | 2.3 |
| 155 | 58*-9-6 | 4.5 | 3.8 | 5 | 5.3 | 4.2 | 4.56 |
| 156 | 58*-9-7 | 4.5 | 3.5 | 3.8 | 3.5 | 3.5 | 3.76 |
| 157 | 58*-9-8 | 2.8 | 2 | 1.5 | 3 | 2.6 | 2.38 |
| 158 | 58*-9-9 | 4.2 | 3.8 | 3.6 | 1.9 | 2.8 | 3.26 |
| 159 | 58*-9-10 | 5.2 | 8.9 | 10.1 | 7.9 | 7.2 | 7.86 |
| 160 | 58*-9-11 | 2.2 | 2.8 | 1.5 | 1.6 | 2.1 | 2.04 |
| 161 | 58*-9-12 | 0.6 | 1.9 | 0.8 | 0.9 | 1 | 1.04 |
| 162 | 58*-9-13 | 7.9 | 7.5 | 4.5 | 3.8 | 3.5 | 5.44 |
| 163 | 58*-9-14 | 4.6 | 3.9 | 3.8 | 5.2 | 5.6 | 4.62 |
| 164 | 58*-9-15 | 4.5 | 5.6 | 6.2 | 8.5 | 7 | 6.36 |
| 165 | 58*-9-16 | 2.5 | 1.8 | 1.9 | 1.3 | 1.9 | 1.88 |
| 166 | 58*-9-17 | 32 | 4.6 | 3.2 | 2.8 | 2.5 | 9.02 |
| 167 | 58*-9-18 | 1.2 | 1.6 | 1.8 | 1 | 1.2 | 1.36 |
| 168 | 58*-9-19 | 5.6 | 6.2 | 4.2 | 3.8 | 6.2 | 5.2 |
| 169 | 58*-9-20 | 6.2 | 7.2 | 7.5 | 5 | 5 | 6.18 |
| 170 | 58*-9-21 | 2.9 | 4 | 3 | 2.5 | 2.6 | 3 |
| 171 | 58*-9-22 | 4 | 1.3 | 1.4 | 2.9 | 2.5 | 2.42 |
| 172 | 58*-9-23 | 5.5 | 4.5 | 4.6 | 3.8 | 3.9 | 4.46 |
| 173 | 58*-9-24 | 5.5 | 5 | 4.5 | 3.9 | 4 | 4.58 |
| 174 | 58*-9-25 | 0.4 | 1 | 0.6 | 0.7 | 0.8 | 0.7 |
| 175 | 58*-9-26 | 2.8 | 2 | 1.9 | 1.8 | 1.4 | 1.98 |
| 176 | 58*-9-27 | 4.5 | 2.3 | 2.8 | 3 | 2.5 | 3.02 |
| 177 | 58*-9-28 | 1.8 | 0.8 | 1 | 1.4 | 1.4 | 1.28 |
| 178 | 58*-9-29 | 2.6 | 7.7 | 2.5 | 2.4 | 1.9 | 3.42 |
| 179 | 58*-9-30 | 0.9 | 0.6 | 6 | 0.5 | 0.8 | 1.76 |
| 180 | 58*-10-1 | 3.8 | 2 | 1.8 | 1.5 | 1.4 | 2.1 |
| 181 | 58*-10-2 | 6.4 | 5 | 3.5 | 4.6 | 4.3 | 4.76 |
| 182 | 58*-10-3 | 3.4 | 3 | 1.9 | 1.8 | 2.1 | 2.44 |
| 183 | 58*-10-4 | 4.8 | 3 | 1.8 | 0.9 | 2.4 | 2.58 |
| 184 | 58*-10-5 | 1.4 | 2 | 2.1 | 2.6 | 2.2 | 2.06 |
| 185 | 58*-10-6 | 2 | 2.1 | 2.2 | 2.2 | 2.6 | 2.22 |
| 186 | 58*-10-7 | 4 | 4.2 | 4.5 | 4 | 3.9 | 4.12 |
| 187 | 58*-10-8 | 4.5 | 4.5 | 7 | 6.8 | 5.9 | 5.74 |
| 188 | 58*-10-9 | 4 | 3.4 | 3.9 | 4 | 3.8 | 3.82 |
| 189 | 58*-10-10 | 2 | 1.2 | 1.5 | 1.8 | 1.9 | 1.68 |
| 190 | 58*-10-11 | 3.8 | 2.2 | 2.3 | 2.5 | 2.5 | 2.66 |
| 191 | 58*-10-12 | 4 | 5.5 | 6 | 4.2 | 5.6 | 5.06 |
| 192 | 58*-10-13 | 10.5 | 8.8 | 10 | 9.8 | 9 | 9.62 |
| 193 | 58*-10-14 | 7.3 | 4 | 4.6 | 3.8 | 4.5 | 4.84 |
| 194 | 58*-10-15 | 3 | 3.2 | 2.5 | 3 | 2.8 | 2.9 |
| 195 | 58*-10-16 | 1.4 | 3 | 2.5 | 2.4 | 2.5 | 2.36 |
| 196 | 58*-10-17 | 0.9 | 0.9 | 1.4 | 0.7 | 0.9 | 0.96 |
| 197 | 58*-10-18 | 2.4 | 2.8 | 3 | 3.2 | 2.8 | 2.84 |
| 198 | 58*-10-19 | 5 | 4.9 | 4.5 | 4.5 | 4 | 4.58 |
| 199 | 58*-10-20 | 6 | 2.4 | 5.5 | 6 | 4 | 4.78 |
| 200 | 58*-10-21 | 1.8 | 1.9 | 3 | 1.2 | 3 | 2.18 |
| 201 | 58*-10-22 |  |  |  |  |  | NI |
| 202 | 58*-10-23 | 5 | 9 | 6.4 | 5.5 | 6.8 | 6.54 |
| 203 | 58*-10-24 | 3 | 1.8 | 1.9 | 3 | 2.8 | 2.5 |
| 204 | 58*-10-25 | 2 | 3 | 2.5 | 1.9 | 1.6 | 2.2 |
| 205 | 58*-10-26 | 1 | 0.9 | 1 | 1.3 | 1.2 | 1.08 |
| 206 | 58*-10-27 | 3.5 | 2.5 | 3.8 | 2.8 | 2.5 | 3.02 |
|  |  |  |  |  |  |  |  |

***** **Disease reaction was based on Chen *et al.* (2000) Resistant (R): ≤3cm; Moderately resistant (MR): 3-6cm; Moderately susceptible (MS): 6-9cm; Susceptible (S): >9cm; NI: not inoculated**

**Supplementary Table 4: Screening of BC2F1 population *X00* strain IX-020**

| **Plant no** | **Plants** | **Leaf 1** | **Leaf 2** | **Leaf 3** | **Leaf 4** | **Leaf 5** | **Mean lesion**  **length (cm)** |  |
| --- | --- | --- | --- | --- | --- | --- | --- | --- |
|  |
| 1 | 58*-9-16*-1 | 6 | 9 | 6 | 5 | 8 | 6.8 |  |
| 2 | 58*-9-16*-2 | 8 | 8 | 6 | 7 | 6 | 7.0 |  |
| 3 | 58*-9-16*-3 | 3 | 3.5 | 6.5 | 5 | 4 | 4.4 |  |
| 4 | 58*-9-16*-4 | 8 | 0.5 | 6.5 | 7 | - | 5.5 |  |
| 5 | 58*-9-16*-5 | 6 | 6.5 | 7 | 7.5 | - | 6.8 |  |
| 6 | 58*-4-14*-1 | 7.5 | 4.5 | 6.5 | - | - | 6.2 |  |
| 7 | 58*-4-14*-2 | 2 | 3 | - | - | - | 2.5 |  |
| 8 | 58*-4-14*-3 | 2.5 | 1.5 | 4 | 4 | - | 3.0 |  |
| 9 | 58*-10-10*-1 | 9 | 9.5 | 8 | - | - | 8.8 |  |
| 10 | 58*-10-10*-2 | 6.5 | 8 | 8.5 | - | - | 7.7 |  |
| 11 | 58*-10-10*-3 | 9 | 8 | 9.5 | - | - | 8.8 |  |
| 12 | 58*-10-10*-4 | 6 | 7 | 7.5 | - | - | 6.8 |  |
| 13 | 58*-10-10*-5 | 4 | 3.5 | 3.5 | 3 | - | 3.5 |  |
| 14 | 58*-5-6*-1 | 4.5 | 2.5 | 4 | 2.5 | 3 | 3.3 |  |
| 15 | 58*-5-6*-2 | 8 | 9 | 10 | 6 | - | 8.3 |  |
| 16 | 58*-5-6*-3 | 3 | 3.5 | - | - | - | 3.3 |  |

***** **Disease reaction was based on Chen *et al.* (2000) Resistant (R): ≤3cm; Moderately resistant (MR): 3-6cm; Moderately susceptible (MS): 6-9cm; Susceptible (S): >9cm; NI: not inoculated**

**Supplementary Table 5: Screening of BC2F2 population *X00* strain IX-020**

| **Plant no** | **Plants** | **Leaf1** | **Leaf2** | **Leaf3** | **Leaf4** | **Leaf5** | **Mean lesion length(cm)** |  |
| --- | --- | --- | --- | --- | --- | --- | --- | --- |
|  |
| 1 | 58*-5-6*-1-1 | 2.9 | 3.5 | 1.9 | 2.1 | 1.5 | 2.4 |  |
| 2 | 58*-5-6*-1-2 | 5.4 | 4.3 | 4.5 | 6 | 5.2 | 5.1 |  |
| 3 | 58*-5-6*-1-3 | 0.5 | 0.6 | 0.3 | 0.2 | 0.1 | 0.3 |  |
| 4 | 58*-5-6*-1-4 | 1.6 | 1.7 | 4.1 | 2.4 | 2.9 | 2.5 |  |
| 5 | 58*-5-6*-1-5 | 4.5 | 6.3 | 5 | 5.9 | 5.4 | 5.4 |  |
| 6 | 58*-5-6*-1-6 | 1.5 | 2.5 | 1 | 1.2 | 1.1 | 1.5 |  |
| 7 | 58*-5-6*-1-7 | 2.4 | 3 | 5 | 5.2 | 3 | 3.7 |  |
| 8 | 58*-5-6*-1-8 | 1.2 | 4 | 3 | 4 | 3.9 | 3.2 |  |
| 9 | 58*-5-6*-3-1 | 0.9 | 0.9 | 0.6 | 0.1 | 0.2 | 0.5 |  |
| 10 | 58*-5-6*-3-2 | 6 | 7.5 | 7 | 7.2 | 8 | 7.1 |  |
| 11 | 58*-5-6*-3-3 | 0.1 | 0.1 | 0.2 | 0.3 | - | 0.2 |  |
| 12 | 58*-5-6*-3-4 | 3.2 | 2.9 | 0.3 | 1.1 | 1.4 | 1.8 |  |
| 13 | 58*-5-6*-3-5 | 1.4 | 0.9 | 0.2 | 0.3 | - | 0.7 |  |
| 14 | 58*-5-6*-3-6 | 0.1 | 0.2 | 0.1 | 0.1 | - | 0.1 |  |
| 15 | 58*-5-6*-3-7 | 0.1 | 0.1 | 0.2 | - | - | 0.1 |  |
| 16 | 58*-5-6*-3-8 | 9.6 | 9.2 | 7 | 9 |  | 8.7 |  |
| 17 | 58*-4-14*-3-1 | 0.4 | 0.3 | 1.1 | 1 | 0.9 | 0.7 |  |
| 18 | 58*-4-14*-3-2 | 0.6 | 0.3 | 1 | 0.9 |  | 0.7 |  |
| 19 | 58*-4-14*-3-3 | 0.5 | 0.3 | 0.2 | 0.1 |  | 0.3 |  |
| 20 | 58*-4-14*-3-4 | 1.9 | 2.1 | 2.9 | 2.6 | 1.5 | 2.2 |  |
| 21 | 58*-4-14*-3-5 | 1 | 1.1 | 0.6 | 0.6 | 0.45 | 0.8 |  |
| 22 | 58*-4-14*-3-6 | 1.5 | 0.1 | 1.1 | 0.2 | 0.1 | 0.6 |  |
| 23 | 58*-4-14*-3-7 | 9 | 10 | 10.3 | 8.4 | 11 | 9.7 |  |
| 24 | 58*-4-14*-3-8 | 8.2 | 4.5 | 3 | 0.5 | 0.6 | 3.4 |  |
| 25 | 58*-4-14*-3-9 | 2 | 1.1 | 0.1 | 0.3 | 0.2 | 0.7 |  |
| 26 | 58*-4-14*-3-10 | 4.5 | 3.5 | 6.5 | 4 | 5.5 | 4.8 |  |

***** **Disease reaction was based on Chen *et al.* (2000) Resistant (R): ≤3cm; Moderately resistant (MR): 3-6cm; Moderately susceptible (MS): 6-9cm; Susceptible (S): >9cm; NI: not inoculated**

**Supplementary Table 6. Performance of BC2F2 population for yield attributing traits**

| **Plant no** | **Plants** | **DFF** | **PH** | **TT** | **PT** | **PL** | **SF** |
| --- | --- | --- | --- | --- | --- | --- | --- |
| Recurrent | IR64 | 91 | 75.0 | 9.3 | 8 | 17.2 | 96.9 |
| Donor | EC861812 | 96 | 95.0 | 10.5 | 9.5 | 23.0 | 95.7 |
| 1 | 58*-5-6*-1-1 | 84 | 82 | 10 | 6 | 24.7 | 24.7 |
| 2 | 58*-5-6*-1-2 | 77 | 71 | 8 | 6 | 22.0 | 20.0 |
| 3 | 58*-5-6*-1-3 | 75 | 71 | 9 | 4 | 22.3 | 30.8 |
| 4 | 58*-5-6*-1-4 | 80 | 78.5 | 15 | 12 | 19.3 | 32.0 |
| 5 | 58*-5-6*-1-5 | 82 | 70 | 16 | 15 | 20.3 | 24.4 |
| 6 | 58*-5-6*-1-6 | 85 | 85 | 11 | 10 | 21.0 | 25.6 |
| 7 | 58*-5-6*-1-7 | 80 | 101 | 16 | 9 | 23.3 | 17.6 |
| 8 | 58*-5-6*-1-8 | 81 | 80 | 21 | 11 | 23.0 | 19.8 |
| 9 | 58*-5-6*-3-1 | 83 | 88 | 12 | 8 | 24.7 | 20.0 |
| 10 | 58*-5-6*-3-2 | 84 | 71 | 11 | 8 | 22.3 | 16.7 |
| 11 | 58*-5-6*-3-3 | 84 | 75 | 25 | 14 | 21.0 | 29.4 |
| 12 | 58*-5-6*-3-4 | 85 | 94 | 25 | 22 | 21.0 | 37.5 |
| 13 | 58*-5-6*-3-5 | 85 | 87 | 20 | 18 | 23.3 | 24.2 |
| 14 | 58*-5-6*-3-6 | 80 | 73 | 9 | 7 | 21.0 | 37.5 |
| 15 | 58*-5-6*-3-7 | 86 | 83 | 17 | 14 | 21.0 | 16.7 |
| 16 | 58*-5-6*-3-8 | 86 | 98 | 8 | 6 | 23.0 | 25.0 |
| 17 | 58*-4-14*3-1 | 81 | 82 | 16 | 12 | 21.7 | 26.9 |
| 18 | 58*-4-14*3-2 | 81 | 86 | 19 | 10 | 23.7 | 20.0 |
| 19 | 58*-4-14*3-3 | 84 | 75 | 17 | 9 | 22.7 | 23.1 |
| 20 | 58*-4-14*3-4 | 85 | 94 | 15 | 10 | 24.7 | 14.8 |
| 21 | 58*-4-14*3-5 | 84 | 86 | 25 | 16 | 23.7 | 43.5 |
| 22 | 58*-4-14*3-6 | 88 | 85 | 19 | 8 | 23.5 | 31.5 |
| 23 | 58*-4-14*3-7 | 84 | 91 | 26 | 13 | 25.0 | 15.5 |
| 24 | 58*-4-14*3-8 | 84 | 86 | 22 | 16 | 25.0 | 88.9 |
| 25 | 58*-4-14*3-9 | 81 | 92 | 18 | 12 | 23.0 | 28.6 |
| 26 | 58*-4-14*3-10 | 85 | 80 | 17 | 10 | 23.0 | 28.6 |
